# Supplementary material for: Ketamine and Active Ketamine Metabolites Regulate STAT3 and the Type I Interferon Pathway in Human Microglia: Molecular Mechanisms Linked to the Antidepressant Effects of Ketamine
Source: Front Pharmacol. 2019 Nov 5;10:1302. doi: 10.3389/fphar.2019.01302 (PMC6848891; doi:10.3389/fphar.2019.01302)
Supplement: Supplementary file 1 [file DataSheet_1.xlsx]

## Sheet: supplementary Table 1
Supplementary Table 1. Primer sequences and antibodies used for experiments
Gene name		asscesion number	PCR product	primer sequence 5'-3'		experiment
STAT3	Fw	NM_139276	176	ATCACGCCTTCTACAGACTGC		realtime PCR
	Rv			CATCCTGGAGATTCTCTACCACT		realtime PCR
JAK1	Fw	NM_002227	101	CTTTGCCCTGTATGACGAGAAC		realtime PCR
	Rv			ACCTCATCCGGTAGTGGAGC		realtime PCR
JAK2	Fw	NM_004972	130	TCTGGGGAGTATGTTGCAGAA		realtime PCR
	Rv			AGACATGGTTGGGTGGATACC		realtime PCR
JAK3	Fw	NM_000215	102	CCTGATCGTGGTCCAGAGAG		realtime PCR
	Rv			GCAGGGATCTTGTGAAATGTCAT		realtime PCR
SOCS1	Fw	NM_003745	113	ggcggccag aaccttcct		realtime PCR
	Rv			gaatgtgcggaagtgcgtg		realtime PCR
SOCS3	Fw	NM_003955.4	184	CCTGCGCCTCAAGACCTTC		realtime PCR
	Rv			GAAGAAGTGGCGCTGGTCCGA		realtime PCR
MX1	Fw	NM_001144925	79	AGCGGGATCGTGACCAGAT		realtime PCR
	Rv			TGACCTTGCCTCTCCACTTATC		realtime PCR
MX2	Fw	NM_002463	125	CAGAGGCAGCAGACGATCAAC		realtime PCR
	Rv			TTGGTCAGGATACCGATGGTC		realtime PCR
OAS1	Fw	NM_016816	170	AGTTGACTGGCGGCTATAAAC		realtime PCR
	Rv			GTGCTTGACTAGGCGGATGAG		realtime PCR
OAS2	Fw	NM_001032731	76	CTCAGAAGCTGGGTTGGTTTAT		realtime PCR
	Rv			ACCATCTCGTCGATCAGTGTC		realtime PCR
C1R	Fw	NM_001733	181	TTCCCCAAGCCTTACCCCAA		realtime PCR
	Rv			AACCCAGTTGCCCACAGAAC		realtime PCR
IRF9	Fw	NM_006084	84	GCCCTACAAGGTGTATCAGTTG		realtime PCR
	Rv			TGCTGTCGCTTTGATGGTACT		realtime PCR
IRF7	Fw	NM_004029	134	ACACCCGAGCTGCACGTTCC		realtime PCR
	Rv			GCAGCAGTTCCTCCGTGTAG		realtime PCR
EEF2	Fw	NM_001961	182	AACTTCACGGTAGACCAGATCC		realtime PCR
	Rv			TCGTCCTTCCGGGTATCAGTG		realtime PCR
GRIK4	Fw	NM_014619	191	GGAATGGTTTTCGGCAGATCG		realtime PCR
	Rv			GCCCTCGTAGCGGTCATTG		realtime PCR
JAK3	Fw	NM_000215	87	AGG CAG CGA GAG GAA AGT C		ChIP-qPCR
JAK3	Rv			GCC CTG ACT TTC GGT AAA TG		ChIP-qPCR
IRF7	Fw	NM_004029	112	GGA CGG GAA GTT TCG TCT C		ChIP-qPCR
IRF7	Rv			TGG TCG CAT CCA ATA ATA AGA A		ChIP-qPCR
MX2	Fw	NM_002463	154	GGATAAGCCTGTGATAGCCG		ChIP-qPCR
MX2	Rv			ATTCAGCTCCTCTCCTGTCC		ChIP-qPCR
IRF9	Fw	NM_006084	190	AGTGGCATCCTGATAGTGAGA		ChIP-qPCR
IRF9	Rv			GCTCAGACGACCTCAGCTTA		ChIP-qPCR
SOCS1	Fw	NM_003745	71	CTG ACG TTG GTC CCC ATC		ChIP-qPCR
SOCS1	Rv			CGA TAA CGC TTG TTG AAA CCT		ChIP-qPCR
SOCS3	Fw	NM_003955.4	60	AAAAGGGGAAGGGGAACC		ChIP-qPCR
SOCS3	Rv			GGAGAGCGGGCAGTTCTA		ChIP-qPCR
antibody	cat#					experiment
STAT3 (D3Z2G) Rabbit mAb	#12640					WB/IP/IF/CHIP
Stat3 (124H6) Mouse mAb	#9139					IF
Mouse IgG2a, Kappa Monoclonal [MOPC-173] - Isotype Control - ChIP Grade	ab18413					ChIP
Anti-PSD95 antibody	ab18258					WB
Anti-Synapsin I antibody	ab64581					WB
Anti-Brain Derived Neurotrophic Factor Antibody						WB
Monoclonal Anti-β-Actin antibody	AB1534					WB
mSin3A Antibody (G-11)	sc-5299					WB/IF
Anti-Histone H3 antibody	ab1791					WB
Alexa Fluor® 488 goat anti-rabbit IgG (H+L)	ab11008					IF
Goat anti-Mouse IgG (H+L) Cross-Adsorbed Secondary Antibody, Alexa Fluor 594	A-11005					IF

## Sheet: supplementary Table 2
Supplementary Table 2. 237 genes were significantly regulated by ketamine and the two active ketamine metabolites (2R,6R)-HNK or (2S,6S)-HNK (log2 fold change ≥1 or ≤1, FDR<0.05)
MRPL23-AS1
PITX3
PRG2
LGI4
CCDC154
DHRS3
CGB
MYBPC2
TFF3
SLC47A2
RASGEF1C
PYY
ADPRH
SERPINF2
BST2
SLC52A1
ASPRV1
BAIAP2L2
C9orf50
PDE4C
RARRES3
TRANK1
SKOR1
CALHM1
MYO15B
ALDH3A1
PTGES
OAS1
PPP1R32
DCST2
PADI4
RNF112
ELFN1
THNSL2
RNF224
EBF4
COL26A1
ESPN
COLQ
GDF15
IL17REL
NRTN
NOXA1
PRKAG2-AS1
TAC3
MX2
TLE6
ANPEP
SPINK2
CACNA2D2
NEURL1
SPOCK2
CYP27A1
BEAN1
KCNA7
GRIP2
SRMS
KCNC3
UBA7
DGCR5
OPRL1
RUNX3
CPZ
CLCNKA
DNAH2
ARMC12
KCNAB2
RASAL1
ABCC3
PPP1R1B
CEBPD
WFIKKN2
CGB2
TFR2
AIFM3
UNC5A
SERPINA5
CABP1
TRAF1
ARMS2
SYT12
LOC101927583
RHBDL3
NMNAT3
IL15RA
NOTUM
SRCIN1
WAS
ERG
MYL3
INHBE
APOE
SPTBN5
C1R
CHADL
CD72
RYR1
RGS11
PTGIS
LDHD
HR
EMID1
VTRNA1-3
CLDN4
GPR132
CDK18
TCAP
LOC100129722
FAM131C
CPNE5
DNAH1
COL8A2
DAPK2
RASL12
CARNS1
LINC00173
BOK-AS1
HTRA3
HLA-DMB
PTP4A3
SCN4A
FOSB
WNT9B
C19orf81
SLC7A3
TNNI1
KCNQ1
PRAP1
SNORD42A
TBX6
SLC5A2
PDGFB
PAK6
KCNK3
LOC388282
GDPD3
GRAMD2
FOS
MIR4664
MMP11
LOC654841
C2orf70
PPP2R2C
ISM2
ZDHHC1
DENND6B
B3GALT4
GPRIN2
DHX58
FAM166B
LPPR3
PLXDC1
CD164L2
FGF14-AS2
IFITM1
OTOF
SLC6A12
LRRC61
SLC7A14
PODNL1
APCDD1L
DICER1-AS1
DBP
KCNH6
ARHGEF16
BHLHA15
MASP1
SNORA68
AURKC
SEMA3G
PCDH7
SULT2B1
CHRNA7
NPM2
KNDC1
MATN4
SYT3
DLX4
CEL
IMPA2
PADI3
RAB37
CDH3
FOXE3
GAL3ST1
JAKMIP3
SLC35D3
CX3CL1
MEI1
ZNF575
TINCR
MIR1281
PTGES3L
BAI2
CIB2
MX1
ABHD14A
VSTM2L
SH2B2
GJC2
DHDH
APOC1
UBAP1L
DYNC2H1
TWF1
IL7R
EEA1
RANBP2
MIR4442
PSMC6
APC
CXCR6
AHCTF1P1
PHEX
DNAH8
SERPINB7
BCLAF1
C12orf60
GRIN3A
ARHGAP18
MPP4
SNORA14B
CCDC58
LINC01111
ANXA1
SACS
HSP90AA1
MCTP1
LOC100129940
CHORDC1
NTNG1
MMP1
LOC152225
KCNE1L
LINC01204
LOC101929427
RPPH1

## Sheet: supplementary Table 3
Supplementary Table 3. pathway analysis for 155 genes can be induced further (FDR<0.05) in the presence of ketamine plus E2 as compare to ketamine or E2 treatment alone
Annotation Cluster 1	Enrichment Score: 3.2389391204992983
Category	Term	Count	%	PValue	Genes	List Total	Pop Hits	Pop Total	Fold Enrichment	Bonferroni	Benjamini	FDR
KEGG_PATHWAY	hsa04978:Mineral absorption	7	2.68199	2.27719e-05	SLC30A1, HMOX1, MT2A, MT1E, MT1X, FTL, MT1F	93	44	6879	11.7676	0.00365961	0.00365961	0.0275226
GOTERM_BP_DIRECT	GO:0071294~cellular response to zinc ion	5	1.91571	5.61295e-05	TSPO, MT2A, MT1E, MT1X, MT1F	193	19	16792	22.8961	0.0599294	0.0599294	0.0897325
INTERPRO	IPR018064:Metallothionein, vertebrate, metal binding site	4	1.53257	0.00023298	MT2A, MT1E, MT1X, MT1F	215	11	18559	31.3894	0.107481	0.107481	0.333835
UP_SEQ_FEATURE	region of interest:Beta	4	1.53257	0.00034757	MT2A, MT1E, MT1X, MT1F	222	13	20063	27.8073	0.248551	0.248551	0.534084
UP_SEQ_FEATURE	region of interest:Alpha	4	1.53257	0.00034757	MT2A, MT1E, MT1X, MT1F	222	13	20063	27.8073	0.248551	0.248551	0.534084
UP_SEQ_FEATURE	metal ion-binding site:Divalent metal cation; cluster B	4	1.53257	0.000438775	MT2A, MT1E, MT1X, MT1F	222	14	20063	25.8211	0.302848	0.165044	0.673789
UP_SEQ_FEATURE	metal ion-binding site:Divalent metal cation; cluster A	4	1.53257	0.000438775	MT2A, MT1E, MT1X, MT1F	222	14	20063	25.8211	0.302848	0.165044	0.673789
UP_KEYWORDS	Metal-thiolate cluster	4	1.53257	0.000452014	MT2A, MT1E, MT1X, MT1F	230	14	20581	25.5665	0.118907	0.118907	0.59602
INTERPRO	IPR003019:Metallothionein superfamily, eukaryotic	4	1.53257	0.000500992	MT2A, MT1E, MT1X, MT1F	215	14	18559	24.6631	0.216939	0.115093	0.716585
INTERPRO	IPR017854:Metallothionein domain	4	1.53257	0.000500992	MT2A, MT1E, MT1X, MT1F	215	14	18559	24.6631	0.216939	0.115093	0.716585
INTERPRO	IPR023587:Metallothionein domain, vertebrate	4	1.53257	0.000500992	MT2A, MT1E, MT1X, MT1F	215	14	18559	24.6631	0.216939	0.115093	0.716585
INTERPRO	IPR000006:Metallothionein, vertebrate	4	1.53257	0.000500992	MT2A, MT1E, MT1X, MT1F	215	14	18559	24.6631	0.216939	0.115093	0.716585
GOTERM_BP_DIRECT	GO:0071276~cellular response to cadmium ion	4	1.53257	0.000889184	HMOX1, MT1E, MT1X, MT1F	193	17	16792	20.4718	0.624474	0.387198	1.41267
GOTERM_BP_DIRECT	GO:0045926~negative regulation of growth	4	1.53257	0.00124594	MT2A, MT1E, MT1X, MT1F	193	19	16792	18.3169	0.746563	0.367166	1.97419
UP_KEYWORDS	Cadmium	3	1.14943	0.00421486	MT1E, MT1X, MT1F	230	9	20581	29.8275	0.693536	0.446408	5.43172
UP_KEYWORDS	Copper	3	1.14943	0.163212	MT1E, MT1X, MT1F	230	65	20581	4.12997	1	0.864076	90.5203
Annotation Cluster 2	Enrichment Score: 1.3286772518071854
Category	Term	Count	%	PValue	Genes	List Total	Pop Hits	Pop Total	Fold Enrichment	Bonferroni	Benjamini	FDR
GOTERM_BP_DIRECT	GO:0051607~defense response to virus	7	2.68199	0.011861	SERINC5, IL6, CARD9, ISG15, OAS3, SLFN11, MX1	193	165	16792	3.69113	0.999998	0.846909	17.3729
UP_KEYWORDS	Immunity	12	4.5977	0.0247789	SERINC5, CARD9, SMPDL3B, ISG15, SQSTM1, CLU, TAP1, OAS3, CD79B, SLFN11, TLR6, MX1	230	500	20581	2.14758	0.999111	0.689917	28.2342
UP_KEYWORDS	Innate immunity	8	3.06513	0.0272421	SERINC5, CARD9, SMPDL3B, ISG15, CLU, OAS3, TLR6, MX1	230	261	20581	2.74276	0.999562	0.668723	30.5943
UP_KEYWORDS	Antiviral defense	5	1.91571	0.0407584	SERINC5, ISG15, OAS3, SLFN11, MX1	230	116	20581	3.85701	0.999991	0.621278	42.3173
GOTERM_BP_DIRECT	GO:0045071~negative regulation of viral genome replication	3	1.14943	0.0764577	ISG15, OAS3, MX1	193	40	16792	6.52539	1	0.981325	71.9756
GOTERM_BP_DIRECT	GO:0045087~innate immune response	9	3.44828	0.120667	F12, SERINC5, CARD9, SMPDL3B, REL, RELB, CLU, TLR6, MX1	193	430	16792	1.82104	1	0.992419	87.2115
GOTERM_BP_DIRECT	GO:0060337~type I interferon signaling pathway	3	1.14943	0.166184	ISG15, OAS3, MX1	193	64	16792	4.07837	1	0.996711	94.5343
Annotation Cluster 3	Enrichment Score: 1.220068026808676
Category	Term	Count	%	PValue	Genes	List Total	Pop Hits	Pop Total	Fold Enrichment	Bonferroni	Benjamini	FDR
GOTERM_MF_DIRECT	GO:0046872~metal ion binding	42	16.092	0.000195446	FGD2, ZNF610, OAS3, ZNF511, ZNF514, ZNF699, ZNF229, NDUFS7, ECE2, ZNF225, SMPDL3B, ZSCAN20, ZNF697, HMOX1, NUDT8, ZNF850, NDUFS8, MT1E, NOS2, CDK15, MT1F, WDFY3, ACY1, ZNF565, MMEL1, ZNF284, NUDT14, ZNF501, HDDC3, KLF15, PCK2, TNNI3, MT1X, NME7, PLEKHF1, ZBED2, ZNF439, ZBED6, MT2A, ZNF433, IDI2, ZNF436	191	2069	16881	1.79413	0.0699506	0.0699506	0.269285
UP_SEQ_FEATURE	zinc finger region:C2H2-type 7	13	4.98084	0.0054299	ZNF565, ZNF610, ZNF284, ZNF501, ZNF514, ZNF229, ZNF699, ZNF439, ZNF225, ZSCAN20, ZNF697, ZNF433, ZNF436	222	463	20063	2.5375	0.988616	0.775043	8.0453
UP_SEQ_FEATURE	zinc finger region:C2H2-type 8	12	4.5977	0.0079828	ZNF699, ZNF229, ZNF439, ZNF565, ZNF225, ZNF284, ZNF610, ZSCAN20, ZNF697, ZNF501, ZNF433, ZNF436	222	427	20063	2.53978	0.998623	0.807382	11.6149
UP_SEQ_FEATURE	zinc finger region:C2H2-type 6	13	4.98084	0.00991448	ZNF565, ZNF610, ZNF284, ZNF501, ZNF514, ZNF229, ZNF699, ZNF439, ZNF225, ZSCAN20, ZNF697, ZNF433, ZNF436	222	501	20063	2.34503	0.999723	0.805646	14.2292
SMART	SM00349:KRAB	11	4.21456	0.00994115	ZNF699, ZNF229, ZNF439, ZNF565, ZNF225, ZNF284, ZNF610, ZNF850, ZNF433, ZNF514, ZNF436	110	392	10057	2.56556	0.66007	0.66007	10.64
UP_SEQ_FEATURE	zinc finger region:C2H2-type 9	11	4.21456	0.0106174	ZNF229, ZNF439, ZNF565, ZNF225, ZNF284, ZNF610, ZSCAN20, ZNF697, ZNF501, ZNF433, ZNF436	222	385	20063	2.58211	0.999845	0.768313	15.1626
UP_SEQ_FEATURE	zinc finger region:C2H2-type 3	15	5.74713	0.011073	ZNF565, ZNF610, ZNF284, ZNF501, ZNF511, KLF15, ZNF514, ZNF699, ZNF229, ZNF439, ZNF225, ZSCAN20, ZNF697, ZNF433, ZNF436	222	636	20063	2.13146	0.999894	0.729516	15.7624
SMART	SM00355:ZnF_C2H2	16	6.13027	0.0171527	ZNF565, ZNF610, ZNF284, ZNF501, ZNF511, KLF15, ZNF514, ZNF699, ZNF229, ZNF439, ZNF225, ZSCAN20, ZNF697, ZNF850, ZNF433, ZNF436	110	762	10057	1.91973	0.845655	0.607133	17.7013
INTERPRO	IPR013087:Zinc finger C2H2-type/integrase DNA-binding domain	16	6.13027	0.0183122	ZNF565, ZNF610, ZNF284, ZNF501, ZNF511, KLF15, ZNF514, ZNF699, ZNF229, ZNF439, ZNF225, ZSCAN20, ZNF697, ZNF850, ZNF433, ZNF436	215	712	18559	1.9398	0.999879	0.895105	23.2977
UP_KEYWORDS	Zinc	38	14.5594	0.0184461	FGD2, ADAMTS14, ZNF610, ZNF511, ZNF514, ZNF699, ZNF229, ECE2, ZNF225, SMPDL3B, SLC30A1, SQSTM1, ZSCAN20, ZNF697, ZNF850, MT1E, NOS2, MT1F, WDFY3, CRIP1, ACY1, ZNF565, MMEL1, ZNF284, ZNF501, KLF15, CSRP1, MT1X, PLEKHF1, ZBED2, ZNF439, ZBED6, CA8, MT2A, PRICKLE2, ZNF433, ZNF436, NMNAT1	230	2348	20581	1.44819	0.994555	0.824078	21.8218
INTERPRO	IPR001909:Krueppel-associated box	11	4.21456	0.0186572	ZNF699, ZNF229, ZNF439, ZNF565, ZNF225, ZNF284, ZNF610, ZNF850, ZNF433, ZNF514, ZNF436	215	402	18559	2.36202	0.999898	0.840887	23.6836
UP_SEQ_FEATURE	zinc finger region:C2H2-type 11	9	3.44828	0.0188445	ZNF699, ZNF229, ZNF439, ZNF565, ZNF225, ZNF284, ZNF697, ZNF433, ZNF436	222	301	20063	2.70221	1	0.858401	25.4027
UP_SEQ_FEATURE	zinc finger region:C2H2-type 5	13	4.98084	0.0192202	ZNF565, ZNF610, ZNF284, ZNF501, ZNF514, ZNF229, ZNF699, ZNF439, ZNF225, ZSCAN20, ZNF697, ZNF433, ZNF436	222	550	20063	2.13611	1	0.830098	25.8415
UP_KEYWORDS	Metal-binding	54	20.6897	0.020865	TNNC1, NDUFS7, SMPDL3B, HMOX1, NDUFS8, NOS2, CIB2, CDK15, FTL, CYP1A1, MMEL1, ZNF284, ZNF501, NME7, ZNF439, CA8, ZNF433, ZNF436, FGD2, ADAMTS14, ZNF610, ETHE1, OAS3, ZNF511, CDH1, ZNF514, ZNF699, ZNF229, ECE2, ZNF225, SQSTM1, ZSCAN20, NUDT8, ZNF697, ZNF850, PRSS3, MT1E, MT1F, WDFY3, CRIP1, ACY1, ZNF565, HDDC3, KLF15, CSRP1, TNNI3, PCK2, MT1X, PLEKHF1, ZBED2, ZBED6, MT2A, PRICKLE2, IDI2	230	3640	20581	1.32749	0.997272	0.692968	24.3311
UP_SEQ_FEATURE	zinc finger region:C2H2-type 4	13	4.98084	0.0300059	ZNF565, ZNF610, ZNF284, ZNF501, ZNF514, ZNF229, ZNF699, ZNF439, ZNF225, ZSCAN20, ZNF697, ZNF433, ZNF436	222	588	20063	1.99806	1	0.918263	37.4566
INTERPRO	IPR015880:Zinc finger, C2H2-like	16	6.13027	0.0310614	ZNF565, ZNF610, ZNF284, ZNF501, ZNF511, KLF15, ZNF514, ZNF699, ZNF229, ZNF439, ZNF225, ZSCAN20, ZNF697, ZNF850, ZNF433, ZNF436	215	762	18559	1.81251	1	0.923188	36.4179
UP_SEQ_FEATURE	zinc finger region:C2H2-type 10	9	3.44828	0.0356266	ZNF699, ZNF229, ZNF439, ZNF565, ZNF225, ZSCAN20, ZNF697, ZNF433, ZNF436	222	341	20063	2.38523	1	0.916671	42.8124
UP_SEQ_FEATURE	domain:KRAB	9	3.44828	0.0367656	ZNF699, ZNF229, ZNF439, ZNF225, ZNF284, ZNF610, ZNF433, ZNF514, ZNF436	222	343	20063	2.37133	1	0.906381	43.8441
UP_SEQ_FEATURE	zinc finger region:C2H2-type 2	13	4.98084	0.0403197	ZNF565, ZNF610, ZNF501, ZNF511, KLF15, ZNF514, ZNF229, ZNF439, ZNF225, ZSCAN20, ZNF697, ZNF433, ZNF436	222	615	20063	1.91034	1	0.895158	46.9525
UP_SEQ_FEATURE	zinc finger region:C2H2-type 1	12	4.5977	0.043788	ZNF699, ZNF439, ZNF565, ZNF225, ZSCAN20, ZNF697, ZNF501, ZNF433, ZNF511, KLF15, ZNF514, ZNF436	222	554	20063	1.95756	1	0.899776	49.8302
INTERPRO	IPR007087:Zinc finger, C2H2	16	6.13027	0.0440387	ZNF565, ZNF610, ZNF284, ZNF501, ZNF511, KLF15, ZNF514, ZNF699, ZNF229, ZNF439, ZNF225, ZSCAN20, ZNF697, ZNF850, ZNF433, ZNF436	215	799	18559	1.72858	1	0.888958	47.6044
UP_SEQ_FEATURE	zinc finger region:C2H2-type 12	7	2.68199	0.0645937	ZNF699, ZNF229, ZNF565, ZNF225, ZNF284, ZNF433, ZNF436	222	256	20063	2.47116	1	0.960392	64.2507
UP_SEQ_FEATURE	zinc finger region:C2H2-type 14	5	1.91571	0.0940803	ZNF699, ZNF229, ZNF225, ZNF284, ZNF433	222	156	20063	2.8966	1	0.986082	78.1738
UP_SEQ_FEATURE	zinc finger region:C2H2-type 16	4	1.53257	0.10518	ZNF699, ZNF229, ZNF225, ZNF433	222	103	20063	3.50967	1	0.989617	81.949
UP_SEQ_FEATURE	zinc finger region:C2H2-type 15	4	1.53257	0.181236	ZNF699, ZNF229, ZNF225, ZNF433	222	133	20063	2.71801	1	0.998203	95.4055
UP_SEQ_FEATURE	zinc finger region:C2H2-type 17	3	1.14943	0.228426	ZNF229, ZNF225, ZNF433	222	82	20063	3.30636	1	0.999358	98.1589
GOTERM_MF_DIRECT	GO:0003700~transcription factor activity, sequence-specific DNA binding	14	5.36398	0.286794	ZNF565, ZNF284, SOX3, RELB, ZNF501, ZNF514, ZNF229, ZNF699, ZNF225, ZBED6, REL, ZSCAN20, NFATC2, ZNF436	191	961	16881	1.28757	1	0.999871	99.0558
GOTERM_CC_DIRECT	GO:0005622~intracellular	19	7.27969	0.288271	IL2RB, CARD9, ZNF565, ZNF610, LGALS1, CLU, NPR3, ZNF514, MT1X, ZNF229, ZNF439, RND1, ZNF225, ZNF850, ZNF433, AKAP7, NOS2, RAMP1, GSTP1	213	1332	18224	1.22043	1	0.93018	98.71
GOTERM_MF_DIRECT	GO:0003677~DNA binding	22	8.42912	0.333103	ZNF565, ZNF284, ZNF610, SOX3, RELB, ZNF501, MBD5, ZNF511, ZNF514, ZNF699, ZNF229, ZBED2, ZNF439, ERCC6, NUPR1, ZNF225, ZNF697, ZNF850, ZNF433, NFATC2, HIST1H4J, ZNF436	191	1674	16881	1.16153	1	0.999917	99.626
UP_SEQ_FEATURE	zinc finger region:C2H2-type 13	4	1.53257	0.393165	ZNF699, ZNF229, ZNF225, ZNF284	222	204	20063	1.77204	1	0.999911	99.9545
UP_KEYWORDS	Zinc-finger	22	8.42912	0.42368	WDFY3, FGD2, ZNF565, ZNF284, ZNF610, ZNF501, ZNF511, KLF15, ZNF514, PLEKHF1, ZNF699, ZNF229, ZBED2, ZNF439, ZBED6, ZNF225, SQSTM1, ZSCAN20, ZNF697, ZNF850, ZNF433, ZNF436	230	1781	20581	1.10534	1	0.923599	99.9315
UP_KEYWORDS	DNA-binding	24	9.1954	0.51583	ZNF565, ZNF610, ZNF284, SOX3, RELB, ZNF501, ZNF511, KLF15, ZNF514, ZNF699, ZNF229, ZNF439, ERCC6, NUPR1, REL, ZBED6, ZNF225, ZSCAN20, ZNF697, ZNF850, ZNF433, NFATC2, HIST1H4J, ZNF436	230	2050	20581	1.0476	1	0.949542	99.9932
UP_KEYWORDS	Transcription regulation	26	9.96169	0.609911	ZNF610, SOX3, ZNF511, TRIB3, ZNF514, ZNF229, ZNF699, ERCC6, REL, ZNF225, ZSCAN20, ZNF697, ZNF850, PER2, NFATC2, ZNF565, ZNF284, RELB, ZNF501, KLF15, ATF7IP2, ZNF439, NUPR1, ZBED6, ZNF433, ZNF436	230	2332	20581	0.997662	1	0.959823	99.9996
GOTERM_BP_DIRECT	GO:0006351~transcription, DNA-templated	22	8.42912	0.653809	ZNF565, ZNF610, ZNF284, SOX3, RELB, ZNF501, TRIB3, ZNF511, ZNF514, ATF7IP2, ZNF699, ZNF229, ZNF439, NUPR1, ZBED6, ZNF225, ZSCAN20, ZNF697, ZNF850, PER2, ZNF433, ZNF436	193	1955	16792	0.979086	1	1	100
GOTERM_BP_DIRECT	GO:0006355~regulation of transcription, DNA-templated	17	6.51341	0.656488	ZNF565, ZNF610, ZNF284, ZNF501, ZNF511, ZNF514, ATF7IP2, ZNF699, ZNF229, ZNF439, ZNF225, ZSCAN20, ZNF697, ZNF850, ZNF433, NFATC2, ZNF436	193	1504	16792	0.983436	1	1	100
UP_KEYWORDS	Nucleus	57	21.8391	0.664348	CBX5, BOK, DGCR6, MX1, AHNAK, IBTK, ZNF284, RELB, ZNF501, MBD5, CDKL2, ZNF439, CEMIP, ZNF433, AKAP7, RPP25L, GSTP1, ZNF436, NMNAT1, FGD2, ZNF610, SOX3, ETHE1, CLU, OAS3, TRIB3, ZNF511, SF3B5, ZNF514, ZNF699, ZNF229, ERCC6, ZNF225, REL, SQSTM1, ZSCAN20, ZNF697, FAT1, ZNF850, PER2, NFATC2, HIST1H4J, HAP1, WDFY3, SHMT2, ZNF565, FIBP, CPNE7, KLF15, CSRP1, ATF7IP2, PLEKHF1, ZBED6, NUPR1, PRICKLE2, SLF…	230	5244	20581	0.972637	1	0.965231	99.9999
UP_KEYWORDS	Transcription	26	9.96169	0.666729	ZNF610, SOX3, ZNF511, TRIB3, ZNF514, ZNF229, ZNF699, ERCC6, REL, ZNF225, ZSCAN20, ZNF697, ZNF850, PER2, NFATC2, ZNF565, ZNF284, RELB, ZNF501, KLF15, ATF7IP2, ZNF439, NUPR1, ZBED6, ZNF433, ZNF436	230	2398	20581	0.970203	1	0.96471	100
GOTERM_MF_DIRECT	GO:0003676~nucleic acid binding	10	3.83142	0.785132	ZNF229, ZNF439, ZNF565, ZNF225, ZNF610, ZNF697, ZNF850, ZNF433, ZNF514, ZNF436	191	985	16881	0.897281	1	1	100
Annotation Cluster 4	Enrichment Score: 1.157350099160474
Category	Term	Count	%	PValue	Genes	List Total	Pop Hits	Pop Total	Fold Enrichment	Bonferroni	Benjamini	FDR
UP_SEQ_FEATURE	domain:Nudix hydrolase	3	1.14943	0.0353912	NUDT14, NUDT8, IDI2	222	27	20063	10.0415	1	0.932297	42.597
INTERPRO	IPR000086:NUDIX hydrolase domain	3	1.14943	0.0384537	NUDT14, NUDT8, IDI2	215	27	18559	9.59121	1	0.93502	43.0358
INTERPRO	IPR015797:NUDIX hydrolase domain-like	3	1.14943	0.0411037	NUDT14, NUDT8, IDI2	215	28	18559	9.24867	1	0.922719	45.2479
UP_KEYWORDS	Magnesium	8	3.06513	0.419648	NUDT14, NUDT8, OAS3, IDI2, CIB2, CDK15, NME7, NMNAT1	230	552	20581	1.29685	1	0.92769	99.9249
Annotation Cluster 5	Enrichment Score: 1.1453910476189573
Category	Term	Count	%	PValue	Genes	List Total	Pop Hits	Pop Total	Fold Enrichment	Bonferroni	Benjamini	FDR
GOTERM_BP_DIRECT	GO:0008299~isoprenoid biosynthetic process	3	1.14943	0.0108126	HMGCR, HMGCS1, IDI2	193	14	16792	18.644	0.999994	0.863975	15.9596
UP_KEYWORDS	Cholesterol biosynthesis	3	1.14943	0.0186103	HMGCR, HMGCS1, IDI2	230	19	20581	14.1288	0.994805	0.731525	21.9945
UP_KEYWORDS	Sterol biosynthesis	3	1.14943	0.0312598	HMGCR, HMGCS1, IDI2	230	25	20581	10.7379	0.999863	0.627698	34.2905
KEGG_PATHWAY	hsa00900:Terpenoid backbone biosynthesis	3	1.14943	0.0343613	HMGCR, HMGCS1, IDI2	93	22	6879	10.0865	0.996409	0.608685	34.4695
UP_KEYWORDS	Steroid biosynthesis	3	1.14943	0.0576941	HMGCR, HMGCS1, IDI2	230	35	20581	7.66994	1	0.721943	54.4219
GOTERM_BP_DIRECT	GO:0006695~cholesterol biosynthetic process	3	1.14943	0.0699254	HMGCR, HMGCS1, IDI2	193	38	16792	6.86883	1	0.977642	68.6316
UP_KEYWORDS	Lipid biosynthesis	5	1.91571	0.0968722	SERINC5, HMGCR, HMGCS1, MBOAT2, IDI2	230	156	20581	2.86803	1	0.813292	74.0044
UP_KEYWORDS	Cholesterol metabolism	3	1.14943	0.132423	HMGCR, HMGCS1, IDI2	230	57	20581	4.70961	1	0.836005	84.7142
UP_KEYWORDS	Sterol metabolism	3	1.14943	0.171099	HMGCR, HMGCS1, IDI2	230	67	20581	4.00668	1	0.867463	91.636
UP_KEYWORDS	Steroid metabolism	3	1.14943	0.248256	HMGCR, HMGCS1, IDI2	230	86	20581	3.12149	1	0.864328	97.702
UP_KEYWORDS	Lipid metabolism	6	2.29885	0.529523	SERINC5, SMPDL3B, HMGCR, HMGCS1, MBOAT2, IDI2	230	433	20581	1.23994	1	0.951005	99.9953
Annotation Cluster 6	Enrichment Score: 1.0866110692481499
Category	Term	Count	%	PValue	Genes	List Total	Pop Hits	Pop Total	Fold Enrichment	Bonferroni	Benjamini	FDR
GOTERM_CC_DIRECT	GO:0016234~inclusion body	3	1.14943	0.0182318	WDFY3, SQSTM1, HAP1	213	18	18224	14.2598	0.984653	0.876116	20.9747
GOTERM_CC_DIRECT	GO:0005776~autophagosome	3	1.14943	0.170713	WDFY3, SQSTM1, HAP1	213	64	18224	4.01056	1	0.929754	90.8811
UP_KEYWORDS	Autophagy	4	1.53257	0.176632	WDFY3, ATG4D, SQSTM1, HAP1	230	130	20581	2.75331	1	0.866746	92.3448
Annotation Cluster 7	Enrichment Score: 1.0565134629084805
Category	Term	Count	%	PValue	Genes	List Total	Pop Hits	Pop Total	Fold Enrichment	Bonferroni	Benjamini	FDR
GOTERM_CC_DIRECT	GO:0005759~mitochondrial matrix	11	4.21456	0.00509958	TST, NDUFS7, PYCR1, SHMT2, ATG4D, ETHE1, PAM16, DTYMK, NDUFS8, TXNRD2, PCK2	213	327	18224	2.87812	0.686691	0.686691	6.33154
UP_KEYWORDS	Mitochondrion	19	7.27969	0.0749757	TSPO, SHMT2, ETHE1, CLU, PCK2, NDUFA11, NDUFS7, TST, PYCR1, ATG4D, BOK, PAM16, NDUFS8, MRPL54, TXNRD2, HAP1, GSTP1, FLVCR1, MPST	230	1119	20581	1.51937	1	0.789592	64.3167
UP_SEQ_FEATURE	transit peptide:Mitochondrion	8	3.06513	0.281839	NDUFS7, SHMT2, ETHE1, NUDT8, NDUFS8, MRPL54, TXNRD2, PCK2	222	482	20063	1.49998	1	0.999846	99.3903
UP_KEYWORDS	Transit peptide	7	2.68199	0.55143	NDUFS7, SHMT2, ETHE1, NDUFS8, MRPL54, TXNRD2, PCK2	230	536	20581	1.16862	1	0.953809	99.9975
Annotation Cluster 8	Enrichment Score: 0.9843127292627093
Category	Term	Count	%	PValue	Genes	List Total	Pop Hits	Pop Total	Fold Enrichment	Bonferroni	Benjamini	FDR
UP_KEYWORDS	Oxidoreductase	13	4.98084	0.0304589	NDUFS7, PYCR1, AKR7L, CYP1A1, DIO2, HMGCR, ETHE1, HMOX1, NDUFS8, PHGDH, TXNRD2, NOS2, SESN2	230	582	20581	1.99875	0.999827	0.661298	33.5686
UP_KEYWORDS	NADP	5	1.91571	0.154006	PYCR1, AKR7L, HMGCR, TXNRD2, NOS2	230	186	20581	2.40545	1	0.869451	89.0447
GOTERM_BP_DIRECT	GO:0055114~oxidation-reduction process	10	3.83142	0.23758	NDUFS7, PYCR1, AKR7L, CYP1A1, DIO2, HMGCR, NDUFA4L2, PHGDH, TXNRD2, NOS2	193	592	16792	1.46968	1	0.998689	98.6942
Annotation Cluster 9	Enrichment Score: 0.9635887785357398
Category	Term	Count	%	PValue	Genes	List Total	Pop Hits	Pop Total	Fold Enrichment	Bonferroni	Benjamini	FDR
GOTERM_BP_DIRECT	GO:0051607~defense response to virus	7	2.68199	0.011861	SERINC5, IL6, CARD9, ISG15, OAS3, SLFN11, MX1	193	165	16792	3.69113	0.999998	0.846909	17.3729
KEGG_PATHWAY	hsa05162:Measles	4	1.53257	0.262663	IL2RB, IL6, OAS3, MX1	93	133	6879	2.22459	1	0.944189	97.4859
KEGG_PATHWAY	hsa05164:Influenza A	4	1.53257	0.412774	IL6, PRSS3, OAS3, MX1	93	174	6879	1.70041	1	0.971876	99.8395
Annotation Cluster 10	Enrichment Score: 0.910829212222269
Category	Term	Count	%	PValue	Genes	List Total	Pop Hits	Pop Total	Fold Enrichment	Bonferroni	Benjamini	FDR
GOTERM_CC_DIRECT	GO:0030054~cell junction	10	3.83142	0.0885773	PARD6A, STON2, RABAC1, DLGAP3, STXBP5, DSP, CDH1, HAP1, FAIM2, MPST	213	459	18224	1.86402	1	0.950595	69.4737
GOTERM_CC_DIRECT	GO:0008021~synaptic vesicle	4	1.53257	0.0921227	STON2, RABAC1, STXBP5, HAP1	213	92	18224	3.71994	1	0.93558	70.9585
UP_KEYWORDS	Cell junction	12	4.5977	0.131014	PARD6A, STON2, RABAC1, CGNL1, CADM3, DLGAP3, STXBP5, DSP, CDH1, HAP1, FAIM2, MPST	230	675	20581	1.5908	1	0.859984	84.3828
UP_KEYWORDS	Synapse	7	2.68199	0.212655	STON2, RABAC1, DLGAP3, STXBP5, HAP1, FAIM2, MPST	230	357	20581	1.75456	1	0.876563	95.763
Annotation Cluster 11	Enrichment Score: 0.8856619171346347
Category	Term	Count	%	PValue	Genes	List Total	Pop Hits	Pop Total	Fold Enrichment	Bonferroni	Benjamini	FDR
INTERPRO	IPR011539:Rel homology domain	3	1.14943	0.0056033	REL, RELB, NFATC2	215	10	18559	25.8963	0.935565	0.599096	7.74745
SMART	SM00429:IPT	3	1.14943	0.034256	REL, RELB, NFATC2	110	27	10057	10.1586	0.976821	0.714877	32.4623
UP_SEQ_FEATURE	short sequence motif:Nuclear localization signal	9	3.44828	0.0374957	ERCC6, NUPR1, REL, RELB, PER2, CSRP1, NFATC2, AHNAK, NMNAT1	222	344	20063	2.36443	1	0.893953	44.4962
INTERPRO	IPR002909:Cell surface receptor IPT/TIG	3	1.14943	0.0494464	REL, RELB, NFATC2	215	31	18559	8.35364	1	0.89457	51.7011
INTERPRO	IPR008967:p53-like transcription factor, DNA-binding	3	1.14943	0.0913784	REL, RELB, NFATC2	215	44	18559	5.88552	1	0.964572	74.7218
GOTERM_MF_DIRECT	GO:0003682~chromatin binding	8	3.06513	0.152973	SHMT2, ERCC6, NUPR1, REL, RELB, MBD5, NFATC2, CBX5	191	391	16881	1.80833	1	0.9963	89.8767
INTERPRO	IPR014756:Immunoglobulin E-set	3	1.14943	0.350268	REL, RELB, NFATC2	215	107	18559	2.42021	1	0.999779	99.7946
UP_KEYWORDS	Activator	6	2.29885	0.862672	NUPR1, REL, RELB, KLF15, NFATC2, ATF7IP2	230	661	20581	0.812248	1	0.995704	100
GOTERM_BP_DIRECT	GO:0006366~transcription from RNA polymerase II promoter	4	1.53257	0.9357	ERCC6, REL, KLF15, NFATC2	193	513	16792	0.678403	1	1	100
GOTERM_BP_DIRECT	GO:0045944~positive regulation of transcription from RNA polymerase II promoter	6	2.29885	0.989103	IL6, REL, SQSTM1, RELB, KLF15, NFATC2	193	981	16792	0.532142	1	1	100
Annotation Cluster 12	Enrichment Score: 0.8778010388764764
Category	Term	Count	%	PValue	Genes	List Total	Pop Hits	Pop Total	Fold Enrichment	Bonferroni	Benjamini	FDR
KEGG_PATHWAY	hsa00190:Oxidative phosphorylation	6	2.29885	0.0323405	NDUFS7, ATP6V0E2, NDUFA4L2, NDUFS8, ATP6V0B, NDUFA11	93	133	6879	3.33689	0.994973	0.65305	32.7924
KEGG_PATHWAY	hsa04932:Non-alcoholic fatty liver disease (NAFLD)	6	2.29885	0.0511931	NDUFS7, IL6, NDUFA4L2, LEPR, NDUFS8, NDUFA11	93	151	6879	2.93912	0.999788	0.7014	47.0176
UP_KEYWORDS	Ubiquinone	3	1.14943	0.0576941	NDUFS7, NDUFA4L2, NDUFS8	230	35	20581	7.66994	1	0.721943	54.4219
GOTERM_MF_DIRECT	GO:0008137~NADH dehydrogenase (ubiquinone) activity	3	1.14943	0.101609	NDUFS7, NDUFA4L2, NDUFS8	191	48	16881	5.52389	1	0.99305	77.1941
GOTERM_BP_DIRECT	GO:0006120~mitochondrial electron transport, NADH to ubiquinone	3	1.14943	0.107971	NDUFS7, NDUFS8, NDUFA11	193	49	16792	5.32685	1	0.990525	83.916
GOTERM_CC_DIRECT	GO:0005747~mitochondrial respiratory chain complex I	3	1.14943	0.111119	NDUFS7, NDUFS8, NDUFA11	213	49	18224	5.23829	1	0.931016	77.8421
UP_KEYWORDS	Respiratory chain	3	1.14943	0.155393	NDUFS7, NDUFS8, NDUFA11	230	63	20581	4.26108	1	0.860587	89.2798
GOTERM_BP_DIRECT	GO:0032981~mitochondrial respiratory chain complex I assembly	3	1.14943	0.162143	NDUFS7, NDUFS8, NDUFA11	193	63	16792	4.1431	1	0.996749	94.0949
KEGG_PATHWAY	hsa05016:Huntington's disease	5	1.91571	0.25498	NDUFS7, NDUFA4L2, NDUFS8, HAP1, NDUFA11	93	192	6879	1.92624	1	0.948276	97.1503
KEGG_PATHWAY	hsa05012:Parkinson's disease	4	1.53257	0.295516	NDUFS7, NDUFA4L2, NDUFS8, NDUFA11	93	142	6879	2.0836	1	0.948607	98.5509
UP_KEYWORDS	Electron transport	3	1.14943	0.338571	NDUFS7, NDUFS8, NDUFA11	230	108	20581	2.48563	1	0.878074	99.577
KEGG_PATHWAY	hsa05010:Alzheimer's disease	4	1.53257	0.391027	NDUFS7, NDUFA4L2, NDUFS8, NDUFA11	93	168	6879	1.76114	1	0.973475	99.751
Annotation Cluster 13	Enrichment Score: 0.84513309882212
Category	Term	Count	%	PValue	Genes	List Total	Pop Hits	Pop Total	Fold Enrichment	Bonferroni	Benjamini	FDR
SMART	SM00228:PDZ	5	1.91571	0.0783722	PARD6A, MPP4, APBA3, PDZK1, AHNAK	110	149	10057	3.06803	0.999851	0.828446	60.1071
INTERPRO	IPR001478:PDZ domain	5	1.91571	0.105001	PARD6A, MPP4, APBA3, PDZK1, AHNAK	215	155	18559	2.78455	1	0.972921	79.6486
UP_SEQ_FEATURE	domain:PDZ	3	1.14943	0.354197	PARD6A, MPP4, AHNAK	222	113	20063	2.39931	1	0.999901	99.8812
Annotation Cluster 14	Enrichment Score: 0.821791763372538
Category	Term	Count	%	PValue	Genes	List Total	Pop Hits	Pop Total	Fold Enrichment	Bonferroni	Benjamini	FDR
SMART	SM00064:FYVE	3	1.14943	0.0390755	PLEKHF1, FGD2, WDFY3	110	29	10057	9.45799	0.986497	0.659113	36.1617
INTERPRO	IPR000306:Zinc finger, FYVE-type	3	1.14943	0.0438204	PLEKHF1, FGD2, WDFY3	215	29	18559	8.92975	1	0.911934	47.4324
INTERPRO	IPR017455:Zinc finger, FYVE-related	3	1.14943	0.05834	PLEKHF1, FGD2, WDFY3	215	34	18559	7.61655	1	0.913232	57.7964
UP_SEQ_FEATURE	zinc finger region:FYVE-type	3	1.14943	0.0686103	PLEKHF1, FGD2, WDFY3	222	39	20063	6.95184	1	0.961065	66.5437
INTERPRO	IPR011011:Zinc finger, FYVE/PHD-type	3	1.14943	0.485291	PLEKHF1, FGD2, WDFY3	215	141	18559	1.83662	1	0.999946	99.9927
INTERPRO	IPR011993:Pleckstrin homology-like domain	6	2.29885	0.548765	PLEKHF1, FGD2, WDFY3, PLEKHJ1, APBA3, ARHGAP9	215	427	18559	1.21294	1	0.999985	99.9989
INTERPRO	IPR013083:Zinc finger, RING/FYVE/PHD-type	3	1.14943	0.968574	PLEKHF1, FGD2, WDFY3	215	453	18559	0.571662	1	1	100
Annotation Cluster 15	Enrichment Score: 0.7257770827754216
Category	Term	Count	%	PValue	Genes	List Total	Pop Hits	Pop Total	Fold Enrichment	Bonferroni	Benjamini	FDR
GOTERM_MF_DIRECT	GO:0008168~methyltransferase activity	4	1.53257	0.0897149	SHMT2, ECE2, TRMT10B, GAMT	191	94	16881	3.76094	1	0.997009	72.6571
GOTERM_BP_DIRECT	GO:0032259~methylation	3	1.14943	0.203234	ECE2, TRMT10B, GAMT	193	73	16792	3.57556	1	0.997409	97.358
UP_KEYWORDS	Methyltransferase	4	1.53257	0.364592	SHMT2, ECE2, TRMT10B, GAMT	230	193	20581	1.85456	1	0.89222	99.7512
Annotation Cluster 16	Enrichment Score: 0.716933657154084
Category	Term	Count	%	PValue	Genes	List Total	Pop Hits	Pop Total	Fold Enrichment	Bonferroni	Benjamini	FDR
SMART	SM00132:LIM	3	1.14943	0.18343	CRIP1, PRICKLE2, CSRP1	110	72	10057	3.80947	1	0.956128	89.7895
UP_KEYWORDS	LIM domain	3	1.14943	0.191074	CRIP1, PRICKLE2, CSRP1	230	72	20581	3.72844	1	0.880026	93.9419
INTERPRO	IPR001781:Zinc finger, LIM-type	3	1.14943	0.201617	CRIP1, PRICKLE2, CSRP1	215	72	18559	3.59671	1	0.997767	96.0499
Annotation Cluster 17	Enrichment Score: 0.6853796772095557
Category	Term	Count	%	PValue	Genes	List Total	Pop Hits	Pop Total	Fold Enrichment	Bonferroni	Benjamini	FDR
INTERPRO	IPR013032:EGF-like, conserved site	6	2.29885	0.0811165	TMEFF2, F12, FAT1, CCBE1, TENM3, BCAN	215	199	18559	2.60264	1	0.958231	70.3009
UP_KEYWORDS	EGF-like domain	6	2.29885	0.126243	TMEFF2, F12, FAT1, CCBE1, TENM3, BCAN	230	238	20581	2.25586	1	0.863137	83.2101
INTERPRO	IPR000742:Epidermal growth factor-like domain	6	2.29885	0.12841	TMEFF2, F12, FAT1, CCBE1, TENM3, BCAN	215	231	18559	2.2421	1	0.984881	86.0874
SMART	SM00181:EGF	5	1.91571	0.147052	F12, FAT1, CCBE1, TENM3, BCAN	110	188	10057	2.43158	1	0.942904	83.3203
UP_SEQ_FEATURE	domain:EGF-like 2	3	1.14943	0.256947	F12, FAT1, TENM3	222	89	20063	3.04631	1	0.999708	98.9694
UP_SEQ_FEATURE	domain:EGF-like 1	3	1.14943	0.381851	F12, FAT1, TENM3	222	120	20063	2.25935	1	0.999918	99.9395
SMART	SM00179:EGF_CA	3	1.14943	0.401535	F12, FAT1, CCBE1	110	127	10057	2.1597	1	0.996091	99.6914
INTERPRO	IPR001881:EGF-like calcium-binding	3	1.14943	0.431634	F12, FAT1, CCBE1	215	127	18559	2.03908	1	0.999898	99.9699
Annotation Cluster 18	Enrichment Score: 0.5586528691313858
Category	Term	Count	%	PValue	Genes	List Total	Pop Hits	Pop Total	Fold Enrichment	Bonferroni	Benjamini	FDR
INTERPRO	IPR008160:Collagen triple helix repeat	3	1.14943	0.244036	CCBE1, COL6A3, C1QTNF2	215	82	18559	3.15808	1	0.998498	98.1956
GOTERM_CC_DIRECT	GO:0005581~collagen trimer	3	1.14943	0.290261	CCBE1, COL6A3, C1QTNF2	213	92	18224	2.78996	1	0.925301	98.7554
UP_KEYWORDS	Collagen	3	1.14943	0.297714	CCBE1, COL6A3, C1QTNF2	230	98	20581	2.73926	1	0.86181	99.0656
Annotation Cluster 19	Enrichment Score: 0.4765226592074921
Category	Term	Count	%	PValue	Genes	List Total	Pop Hits	Pop Total	Fold Enrichment	Bonferroni	Benjamini	FDR
UP_SEQ_FEATURE	active site:Charge relay system	5	1.91571	0.186202	F12, HMGCR, PRSS3, ST14, PCSK7	222	203	20063	2.22596	1	0.998113	95.8166
UP_KEYWORDS	Serine protease	4	1.53257	0.207614	F12, PRSS3, ST14, PCSK7	230	141	20581	2.53851	1	0.877772	95.3899
UP_KEYWORDS	Protease	9	3.44828	0.26096	F12, ECE2, ATG4D, ADAMTS14, JOSD2, MMEL1, PRSS3, ST14, PCSK7	230	544	20581	1.48041	1	0.866816	98.1657
INTERPRO	IPR018114:Peptidase S1, trypsin family, active site	3	1.14943	0.329266	F12, PRSS3, ST14	215	102	18559	2.53885	1	0.999703	99.6758
UP_SEQ_FEATURE	domain:Peptidase S1	3	1.14943	0.338201	F12, PRSS3, ST14	222	109	20063	2.48735	1	0.999896	99.8269
SMART	SM00020:Tryp_SPc	3	1.14943	0.366792	F12, PRSS3, ST14	110	118	10057	2.32442	1	0.995845	99.4173
INTERPRO	IPR001254:Peptidase S1	3	1.14943	0.403717	F12, PRSS3, ST14	215	120	18559	2.15802	1	0.999878	99.9401
UP_KEYWORDS	Zymogen	4	1.53257	0.426062	F12, ADAMTS14, PRSS3, PCSK7	230	214	20581	1.67257	1	0.92181	99.9352
INTERPRO	IPR009003:Trypsin-like cysteine/serine peptidase domain	3	1.14943	0.435566	F12, PRSS3, ST14	215	128	18559	2.02315	1	0.999877	99.9728
GOTERM_MF_DIRECT	GO:0004252~serine-type endopeptidase activity	4	1.53257	0.556178	F12, PRSS3, ST14, PCSK7	191	255	16881	1.38639	1	0.999996	99.9986
Annotation Cluster 20	Enrichment Score: 0.45286004703380317
Category	Term	Count	%	PValue	Genes	List Total	Pop Hits	Pop Total	Fold Enrichment	Bonferroni	Benjamini	FDR
UP_KEYWORDS	Iron	6	2.29885	0.293884	NDUFS7, CYP1A1, HMOX1, NDUFS8, NOS2, FTL	230	324	20581	1.65709	1	0.86309	98.9959
UP_SEQ_FEATURE	metal ion-binding site:Iron (heme axial ligand)	3	1.14943	0.297749	CYP1A1, HMOX1, NOS2	222	99	20063	2.7386	1	0.99985	99.5682
GOTERM_BP_DIRECT	GO:0001666~response to hypoxia	4	1.53257	0.31363	CYP1A1, HMOX1, APOLD1, NOS2	193	172	16792	2.02338	1	0.999704	99.7568
UP_KEYWORDS	Heme	3	1.14943	0.433043	CYP1A1, HMOX1, NOS2	230	132	20581	2.0337	1	0.922909	99.9449
GOTERM_MF_DIRECT	GO:0020037~heme binding	3	1.14943	0.457852	CYP1A1, HMOX1, NOS2	191	137	16881	1.93538	1	0.999988	99.9785
Annotation Cluster 21	Enrichment Score: 0.4490088072173472
Category	Term	Count	%	PValue	Genes	List Total	Pop Hits	Pop Total	Fold Enrichment	Bonferroni	Benjamini	FDR
GOTERM_BP_DIRECT	GO:0007156~homophilic cell adhesion via plasma membrane adhesion molecules	5	1.91571	0.10775	PCDHGA12, CADM3, FAT1, TENM3, CDH1	193	158	16792	2.75333	1	0.991996	83.8522
UP_KEYWORDS	Cell adhesion	8	3.06513	0.289146	PCDHGA12, CADM3, FAT1, COL6A3, TENM3, CDH1, VTN, NTM	230	479	20581	1.49449	1	0.863421	98.903
UP_SEQ_FEATURE	domain:Cadherin 5	3	1.14943	0.322088	PCDHGA12, FAT1, CDH1	222	105	20063	2.58211	1	0.99986	99.7492
UP_SEQ_FEATURE	domain:Cadherin 4	3	1.14943	0.35021	PCDHGA12, FAT1, CDH1	222	112	20063	2.42073	1	0.999911	99.8694
UP_SEQ_FEATURE	domain:Cadherin 3	3	1.14943	0.35021	PCDHGA12, FAT1, CDH1	222	112	20063	2.42073	1	0.999911	99.8694
SMART	SM00112:CA	3	1.14943	0.358965	PCDHGA12, FAT1, CDH1	110	116	10057	2.3645	1	0.997529	99.3309
UP_SEQ_FEATURE	domain:Cadherin 2	3	1.14943	0.362145	PCDHGA12, FAT1, CDH1	222	115	20063	2.35758	1	0.999903	99.9019
UP_SEQ_FEATURE	domain:Cadherin 1	3	1.14943	0.362145	PCDHGA12, FAT1, CDH1	222	115	20063	2.35758	1	0.999903	99.9019
INTERPRO	IPR020894:Cadherin conserved site	3	1.14943	0.37517	PCDHGA12, FAT1, CDH1	215	113	18559	2.29171	1	0.999853	99.8828
INTERPRO	IPR002126:Cadherin	3	1.14943	0.395621	PCDHGA12, FAT1, CDH1	215	118	18559	2.1946	1	0.999888	99.9273
INTERPRO	IPR015919:Cadherin-like	3	1.14943	0.403717	PCDHGA12, FAT1, CDH1	215	120	18559	2.15802	1	0.999878	99.9401
GOTERM_CC_DIRECT	GO:0005911~cell-cell junction	3	1.14943	0.597092	PCDHGA12, CADM3, FAT1	213	172	18224	1.4923	1	0.989803	99.9991
GOTERM_MF_DIRECT	GO:0005509~calcium ion binding	8	3.06513	0.7019	PCDHGA12, F12, TNNC1, FAT1, CCBE1, PRSS3, CDH1, CIB2	191	717	16881	0.986133	1	1	100
Annotation Cluster 22	Enrichment Score: 0.43346569518328704
Category	Term	Count	%	PValue	Genes	List Total	Pop Hits	Pop Total	Fold Enrichment	Bonferroni	Benjamini	FDR
INTERPRO	IPR024079:Metallopeptidase, catalytic domain	3	1.14943	0.239769	ECE2, ADAMTS14, MMEL1	215	81	18559	3.19707	1	0.998755	98.0437
GOTERM_MF_DIRECT	GO:0004222~metalloendopeptidase activity	3	1.14943	0.36403	ECE2, ADAMTS14, MMEL1	191	113	16881	2.34643	1	0.999949	99.8057
UP_SEQ_FEATURE	metal ion-binding site:Zinc; catalytic	3	1.14943	0.416642	ECE2, ADAMTS14, MMEL1	222	129	20063	2.10172	1	0.999934	99.9752
UP_KEYWORDS	Metalloprotease	3	1.14943	0.50751	ECE2, ADAMTS14, MMEL1	230	152	20581	1.7661	1	0.94818	99.9914
Annotation Cluster 23	Enrichment Score: 0.348947188973893
Category	Term	Count	%	PValue	Genes	List Total	Pop Hits	Pop Total	Fold Enrichment	Bonferroni	Benjamini	FDR
GOTERM_CC_DIRECT	GO:0005576~extracellular region	22	8.42912	0.323674	SHBG, F12, TMEFF2, IL6, ADAMTS14, MMEL1, LEPR, CLU, APOLD1, BCAN, CDH1, VTN, TMEM155, FOLR3, CRISPLD1, ISG15, COL6A3, PRSS3, CEMIP, NPPB, ADM2, HIST1H4J	213	1610	18224	1.16912	1	0.926542	99.3284
UP_KEYWORDS	Disulfide bond	42	16.092	0.335691	KCNMB3, CADM3, ADAMTS14, GCNT7, LEPR, CLU, BCAN, VTN, CDH1, TLR6, CCL26, OLFML3, FOLR3, ISG15, SMPDL3B, CRISPLD1, UNC5A, FAT1, CCBE1, PRSS3, COL6A3, SLC4A7, ADRA2C, GCNT1, RAMP1, SHBG, F12, TMEFF2, IL6, IL2RB, MPZ, MMEL1, SLC3A2, NPR3, TENM3, ST14, NPPB, TXNRD2, CD79B, ADM2, NTM, MPST	230	3434	20581	1.09443	1	0.884767	99.552
UP_KEYWORDS	Secreted	25	9.57854	0.346243	SHBG, F12, TMEFF2, IL6, ADAMTS14, MMEL1, LEPR, LGALS1, CLU, BCAN, VTN, TMEM155, CCL26, OLFML3, FOLR3, ISG15, SMPDL3B, CRISPLD1, PRSS3, C1QTNF2, CCBE1, COL6A3, CEMIP, NPPB, ADM2	230	1965	20581	1.13846	1	0.880578	99.6374
UP_SEQ_FEATURE	disulfide bond	35	13.41	0.388542	CADM3, ADAMTS14, GCNT7, LEPR, CLU, BCAN, VTN, CDH1, CCL26, OLFML3, CRISPLD1, UNC5A, FAT1, COL6A3, CCBE1, PRSS3, ADRA2C, GCNT1, RAMP1, SHBG, TMEFF2, F12, IL6, IL2RB, MPZ, MMEL1, SLC3A2, NPR3, TENM3, ST14, NPPB, TXNRD2, CD79B, ADM2, NTM	222	2917	20063	1.08436	1	0.999918	99.9488
UP_SEQ_FEATURE	signal peptide	39	14.9425	0.445885	NAGLU, CADM3, ADAMTS14, LEPR, CLU, BCAN, VTN, CDH1, TMEM155, TLR6, IL17RD, CCL26, OLFML3, FOLR3, SMPDL3B, CRISPLD1, UNC5A, FAT1, CCBE1, PRSS3, C1QTNF2, COL6A3, PCSK7, CCDC107, RAMP1, PCDHGA12, SHBG, TMEFF2, F12, IL6, IL2RB, MPZ, NPR3, IFI27L2, CEMIP, NPPB, CD79B, ADM2, NTM	222	3346	20063	1.05337	1	0.999959	99.9888
UP_KEYWORDS	Signal	48	18.3908	0.479559	NAGLU, CADM3, TSPO, ADAMTS14, LEPR, CLU, BCAN, VTN, CDH1, TMEM155, TLR6, IL17RD, ATP6V0B, CCL26, OLFML3, FOLR3, SMPDL3B, CRISPLD1, SLC30A1, UNC5A, FAT1, NDUFS8, CCBE1, PRSS3, C1QTNF2, COL6A3, PCSK7, CCDC107, RAMP1, PCDHGA12, SHBG, F12, TMEFF2, IL6, IL2RB, MPZ, CYP1A1, NPR3, IFI27L2, DIO2, CEMIP, PHGDH, ZNF433, NPPB, QPRT, CD79B, ADM2, NTM	230	4160	20581	1.03249	1	0.939991	99.9822
UP_KEYWORDS	Glycoprotein	49	18.7739	0.688412	KCNMB3, GYPC, CADM3, NAGLU, ADAMTS14, HMGCR, GCNT7, LEPR, CLU, BCAN, VTN, CDH1, TLR6, IL17RD, ECE2, SERINC5, OLFML3, FOLR3, SMPDL3B, UNC5A, SLC30A1, FAT1, COL6A3, CCBE1, SLC4A7, ADRA2C, PCSK7, GCNT1, FLVCR1, PCDHGA12, SHBG, F12, TMEFF2, IL2RB, IL6, MPZ, CYP1A1, MMEL1, SLC3A2, NPR3, TST, ST14, TENM3, CEMIP, NPPB, CD79B, SLC15A3, NTM, FAIM2	230	4551	20581	0.963447	1	0.968989	100
UP_SEQ_FEATURE	glycosylation site:N-linked (GlcNAc...)	44	16.8582	0.751005	KCNMB3, GYPC, NAGLU, CADM3, ADAMTS14, HMGCR, GCNT7, LEPR, CLU, BCAN, VTN, CDH1, TLR6, IL17RD, OLFML3, SERINC5, ECE2, FOLR3, SMPDL3B, SLC30A1, UNC5A, FAT1, COL6A3, CCBE1, SLC4A7, ADRA2C, PCSK7, GCNT1, PCDHGA12, SHBG, F12, TMEFF2, IL6, IL2RB, MMEL1, SLC3A2, SLC6A9, TENM3, ST14, CEMIP, CD79B, SLC15A3, NTM, FAIM2	222	4234	20063	0.939171	1	1	100
Annotation Cluster 24	Enrichment Score: 0.31755339008747124
Category	Term	Count	%	PValue	Genes	List Total	Pop Hits	Pop Total	Fold Enrichment	Bonferroni	Benjamini	FDR
GOTERM_CC_DIRECT	GO:0005887~integral component of plasma membrane	21	8.04598	0.212207	KCNMB3, GYPC, CADM3, IL2RB, MPZ, TRPV3, NPR3, TLR6, IL17RD, SLC6A9, SLC16A4, BEST1, FAT1, TAP1, ST14, TENM3, SLC4A7, CD79B, ADRA2C, RAMP1, FLVCR1	213	1415	18224	1.26978	1	0.924096	95.2713
UP_KEYWORDS	Membrane	89	34.0996	0.283512	GYPC, CADM3, TSPO, HMGCR, LEPR, TRPV3, BCAN, TMEM238, TLR6, IL17RD, TMEM54, RABAC1, SMPDL3B, UNC5A, BOK, HMOX1, CCDC107, CIB2, MX1, RAMP1, FLVCR1, IBTK, PCDHGA12, TMEFF2, CYP1A1, MMEL1, TMEM255B, SLC3A2, APOLD1, YIF1B, YIF1A, NDUFA11, RND1, STXBP5, PAM16, ST14, CEMIP, DSP, AKAP7, FAIM2, FBXL2, STON2, KCNMB3, FGD2, GCNT7, CLU, OAS3, CDH1, MIR17HG, ATP6V0B, ZDHHC22, ECE2, SERINC5, BEST1, SLC30A1, F…	230	7494	20581	1.06271	1	0.868579	98.7823
UP_SEQ_FEATURE	topological domain:Extracellular	32	12.2605	0.506352	KCNMB3, GYPC, CADM3, GCNT7, LEPR, TRPV3, CDH1, TLR6, IL17RD, SERINC5, BEST1, SLC30A1, UNC5A, FAT1, SLC4A7, ADRA2C, PCSK7, RAMP1, PCDHGA12, TMEFF2, IL2RB, MPZ, TMEM222, SLC3A2, NPR3, YIF1B, YIF1A, SLC6A9, SLC16A4, TENM3, ST14, CD79B	222	2787	20063	1.03766	1	0.999986	99.9981
UP_KEYWORDS	Transmembrane helix	63	24.1379	0.566052	GYPC, CADM3, TSPO, HMGCR, LEPR, TRPV3, TMEM238, TLR6, IL17RD, TMEM54, RABAC1, BOK, UNC5A, HMOX1, CCDC107, RAMP1, FLVCR1, PCDHGA12, TMEFF2, MMEL1, TMEM255B, APOLD1, SLC3A2, YIF1B, YIF1A, NDUFA11, ST14, FAIM2, KCNMB3, GCNT7, OAS3, CDH1, MIR17HG, ATP6V0B, ZDHHC22, SERINC5, ECE2, BEST1, SLC30A1, FAT1, TAP1, SLC4A7, ADRA2C, PCSK7, GCNT1, IL2RB, SPNS3, TMEM222, MPZ, NDUFA4L2, NPR3, XKR9, IFI27L2, TUBA8…	230	5634	20581	1.0006	1	0.955697	99.9984
UP_SEQ_FEATURE	transmembrane region	56	21.4559	0.568922	GYPC, CADM3, TSPO, HMGCR, LEPR, TRPV3, TLR6, IL17RD, TMEM54, RABAC1, UNC5A, CCDC107, RAMP1, FLVCR1, PCDHGA12, TMEFF2, MMEL1, TMEM255B, APOLD1, SLC3A2, YIF1B, YIF1A, NDUFA11, ST14, FAIM2, KCNMB3, GCNT7, CDH1, ATP6V0B, SERINC5, ECE2, ZDHHC22, BEST1, SLC30A1, FAT1, TAP1, SLC4A7, ADRA2C, PCSK7, GCNT1, IL2RB, MPZ, TMEM222, SPNS3, XKR9, NPR3, HID1, IFI27L2, SLC6A9, ATP6V0E2, SLC16A4, DIO2, TENM3, MBOAT…	222	5056	20063	1.00098	1	0.999996	99.9998
UP_KEYWORDS	Transmembrane	63	24.1379	0.577102	GYPC, CADM3, TSPO, HMGCR, LEPR, TRPV3, TMEM238, TLR6, IL17RD, TMEM54, RABAC1, BOK, UNC5A, HMOX1, CCDC107, RAMP1, FLVCR1, PCDHGA12, TMEFF2, MMEL1, TMEM255B, APOLD1, SLC3A2, YIF1B, YIF1A, NDUFA11, ST14, FAIM2, KCNMB3, GCNT7, OAS3, CDH1, MIR17HG, ATP6V0B, ZDHHC22, SERINC5, ECE2, BEST1, SLC30A1, FAT1, TAP1, SLC4A7, ADRA2C, PCSK7, GCNT1, IL2RB, SPNS3, TMEM222, MPZ, NDUFA4L2, NPR3, XKR9, IFI27L2, TUBA8…	230	5651	20581	0.997594	1	0.952656	99.9989
UP_SEQ_FEATURE	topological domain:Cytoplasmic	38	14.5594	0.603783	KCNMB3, GYPC, CADM3, GCNT7, LEPR, TRPV3, CDH1, TLR6, IL17RD, ATP6V0B, RABAC1, SERINC5, ECE2, BEST1, SLC30A1, UNC5A, FAT1, TAP1, SLC4A7, ADRA2C, PCSK7, GCNT1, RAMP1, PCDHGA12, TMEFF2, IL2RB, MPZ, TMEM222, MMEL1, SLC3A2, NPR3, YIF1B, YIF1A, SLC6A9, SLC16A4, TENM3, ST14, CD79B	222	3456	20063	0.993694	1	0.999997	99.9999
GOTERM_CC_DIRECT	GO:0016021~integral component of membrane	55	21.0728	0.842845	TSPO, HMGCR, LEPR, TRPV3, TMEM238, TLR6, TMEM54, RABAC1, BOK, UNC5A, HMOX1, CCDC107, RAMP1, FLVCR1, PCDHGA12, TMEFF2, MMEL1, TMEM255B, APOLD1, SLC3A2, YIF1B, YIF1A, NDUFA11, STXBP5, FAIM2, GCNT7, OAS3, CDH1, MIR17HG, ATP6V0B, SERINC5, ECE2, ZDHHC22, BEST1, SLC30A1, FAT1, TAP1, SLC4A7, ADRA2C, PCSK7, GCNT1, TMEM222, SPNS3, NDUFA4L2, XKR9, NPR3, IFI27L2, TUBA8, ATP6V0E2, SLC16A4, DIO2, TENM3, MBOAT…	213	5163	18224	0.911433	1	0.999191	100
Annotation Cluster 25	Enrichment Score: 0.2744882093734236
Category	Term	Count	%	PValue	Genes	List Total	Pop Hits	Pop Total	Fold Enrichment	Bonferroni	Benjamini	FDR
GOTERM_MF_DIRECT	GO:0005525~GTP binding	6	2.29885	0.435593	RAB41, TUBA8, RND1, PCK2, MX1, C9ORF69	191	384	16881	1.38097	1	0.999986	99.9626
UP_SEQ_FEATURE	nucleotide phosphate-binding region:GTP	5	1.91571	0.45307	RAB41, TUBA8, RND1, PCK2, MX1	222	310	20063	1.45764	1	0.99996	99.9908
UP_KEYWORDS	GTP-binding	5	1.91571	0.5443	RAB41, TUBA8, RND1, PCK2, MX1	230	343	20581	1.30441	1	0.954924	99.9969
GOTERM_MF_DIRECT	GO:0003924~GTPase activity	3	1.14943	0.742955	TUBA8, RND1, MX1	191	234	16881	1.13311	1	1	100
Annotation Cluster 26	Enrichment Score: 0.2679399870975719
Category	Term	Count	%	PValue	Genes	List Total	Pop Hits	Pop Total	Fold Enrichment	Bonferroni	Benjamini	FDR
INTERPRO	IPR019775:WD40 repeat, conserved site	4	1.53257	0.300273	WDFY3, STXBP5, WDR31, EML6	215	166	18559	2.08002	1	0.999487	99.405
INTERPRO	IPR017986:WD40-repeat-containing domain	5	1.91571	0.470441	WDFY3, STXBP5, TENM3, WDR31, EML6	215	306	18559	1.41047	1	0.999938	99.9891
UP_SEQ_FEATURE	repeat:WD 5	4	1.53257	0.486271	WDFY3, STXBP5, WDR31, EML6	222	237	20063	1.5253	1	0.999982	99.9965
UP_SEQ_FEATURE	repeat:WD 4	4	1.53257	0.543586	WDFY3, STXBP5, WDR31, EML6	222	255	20063	1.41763	1	0.999993	99.9994
SMART	SM00320:WD40	4	1.53257	0.556503	WDFY3, STXBP5, WDR31, EML6	110	267	10057	1.3697	1	0.999336	99.9894
UP_SEQ_FEATURE	repeat:WD 3	4	1.53257	0.573364	WDFY3, STXBP5, WDR31, EML6	222	269	20063	1.34385	1	0.999995	99.9998
UP_SEQ_FEATURE	repeat:WD 2	4	1.53257	0.593521	WDFY3, STXBP5, WDR31, EML6	222	278	20063	1.30034	1	0.999996	99.9999
UP_SEQ_FEATURE	repeat:WD 1	4	1.53257	0.593521	WDFY3, STXBP5, WDR31, EML6	222	278	20063	1.30034	1	0.999996	99.9999
INTERPRO	IPR001680:WD40 repeat	4	1.53257	0.599811	WDFY3, STXBP5, WDR31, EML6	215	268	18559	1.28837	1	0.999996	99.9998
UP_KEYWORDS	WD repeat	4	1.53257	0.607577	WDFY3, STXBP5, WDR31, EML6	230	281	20581	1.27377	1	0.960582	99.9996
INTERPRO	IPR015943:WD40/YVTN repeat-like-containing domain	4	1.53257	0.738085	WDFY3, STXBP5, WDR31, EML6	215	331	18559	1.04315	1	1	100
Annotation Cluster 27	Enrichment Score: 0.2542762686785757
Category	Term	Count	%	PValue	Genes	List Total	Pop Hits	Pop Total	Fold Enrichment	Bonferroni	Benjamini	FDR
UP_SEQ_FEATURE	domain:Ig-like V-type	4	1.53257	0.170339	CADM3, MPZ, BCAN, CD79B	222	129	20063	2.80229	1	0.998737	94.3677
INTERPRO	IPR013098:Immunoglobulin I-set	3	1.14943	0.485291	CADM3, UNC5A, NTM	215	141	18559	1.83662	1	0.999946	99.9927
INTERPRO	IPR013783:Immunoglobulin-like fold	12	4.5977	0.539725	IL2RB, CADM3, MPZ, REL, UNC5A, LEPR, RELB, COL6A3, BCAN, CD79B, NFATC2, NTM	215	951	18559	1.08922	1	0.999985	99.9985
UP_KEYWORDS	Immunoglobulin domain	7	2.68199	0.569564	CADM3, MPZ, UNC5A, LEPR, BCAN, CD79B, NTM	230	546	20581	1.14721	1	0.955204	99.9986
SMART	SM00409:IG	6	2.29885	0.631395	CADM3, MPZ, UNC5A, BCAN, CD79B, NTM	110	497	10057	1.10375	1	0.999749	99.9987
INTERPRO	IPR003599:Immunoglobulin subtype	6	2.29885	0.682182	CADM3, MPZ, UNC5A, BCAN, CD79B, NTM	215	497	18559	1.0421	1	1	100
INTERPRO	IPR007110:Immunoglobulin-like domain	7	2.68199	0.884097	CADM3, MPZ, UNC5A, LEPR, BCAN, CD79B, NTM	215	771	18559	0.783718	1	1	100
INTERPRO	IPR013106:Immunoglobulin V-set	3	1.14943	0.955115	MPZ, BCAN, CD79B	215	417	18559	0.621014	1	1	100
Annotation Cluster 28	Enrichment Score: 0.2433757813981771
Category	Term	Count	%	PValue	Genes	List Total	Pop Hits	Pop Total	Fold Enrichment	Bonferroni	Benjamini	FDR
UP_SEQ_FEATURE	repeat:LRR 11	3	1.14943	0.305881	COL6A3, TLR6, FBXL2	222	101	20063	2.68437	1	0.999811	99.6391
UP_SEQ_FEATURE	repeat:LRR 10	3	1.14943	0.366106	COL6A3, TLR6, FBXL2	222	116	20063	2.33726	1	0.999893	99.9109
UP_SEQ_FEATURE	repeat:LRR 9	3	1.14943	0.435545	COL6A3, TLR6, FBXL2	222	134	20063	2.0233	1	0.999955	99.9851
UP_SEQ_FEATURE	repeat:LRR 8	3	1.14943	0.486641	COL6A3, TLR6, FBXL2	222	148	20063	1.8319	1	0.999978	99.9965
UP_SEQ_FEATURE	repeat:LRR 7	3	1.14943	0.579934	COL6A3, TLR6, FBXL2	222	176	20063	1.54046	1	0.999995	99.9998
UP_SEQ_FEATURE	repeat:LRR 6	3	1.14943	0.672876	COL6A3, TLR6, FBXL2	222	209	20063	1.29723	1	1	100
UP_SEQ_FEATURE	repeat:LRR 1	4	1.53257	0.689541	WDFY3, COL6A3, TLR6, FBXL2	222	321	20063	1.12615	1	1	100
UP_SEQ_FEATURE	repeat:LRR 2	4	1.53257	0.691559	WDFY3, COL6A3, TLR6, FBXL2	222	322	20063	1.12266	1	1	100
UP_SEQ_FEATURE	repeat:LRR 5	3	1.14943	0.725206	COL6A3, TLR6, FBXL2	222	231	20063	1.17369	1	1	100
UP_SEQ_FEATURE	repeat:LRR 4	3	1.14943	0.774075	COL6A3, TLR6, FBXL2	222	255	20063	1.06322	1	1	100
UP_SEQ_FEATURE	repeat:LRR 3	3	1.14943	0.848239	COL6A3, TLR6, FBXL2	222	302	20063	0.897754	1	1	100
Annotation Cluster 29	Enrichment Score: 0.21499602263054726
Category	Term	Count	%	PValue	Genes	List Total	Pop Hits	Pop Total	Fold Enrichment	Bonferroni	Benjamini	FDR
INTERPRO	IPR011993:Pleckstrin homology-like domain	6	2.29885	0.548765	PLEKHF1, FGD2, WDFY3, PLEKHJ1, APBA3, ARHGAP9	215	427	18559	1.21294	1	0.999985	99.9989
SMART	SM00233:PH	4	1.53257	0.548791	PLEKHF1, FGD2, PLEKHJ1, ARHGAP9	110	264	10057	1.38526	1	0.999596	99.9872
INTERPRO	IPR001849:Pleckstrin homology domain	4	1.53257	0.607358	PLEKHF1, FGD2, PLEKHJ1, ARHGAP9	215	271	18559	1.27411	1	0.999996	99.9999
UP_SEQ_FEATURE	domain:PH	3	1.14943	0.754705	PLEKHF1, PLEKHJ1, ARHGAP9	222	245	20063	1.10662	1	1	100
Annotation Cluster 30	Enrichment Score: 0.11872764641472941
Category	Term	Count	%	PValue	Genes	List Total	Pop Hits	Pop Total	Fold Enrichment	Bonferroni	Benjamini	FDR
UP_SEQ_FEATURE	repeat:ANK 3	3	1.14943	0.667741	IBTK, TRPV3, ASB3	222	207	20063	1.30977	1	1	100
UP_SEQ_FEATURE	repeat:ANK 1	3	1.14943	0.752692	IBTK, TRPV3, ASB3	222	244	20063	1.11115	1	1	100
UP_SEQ_FEATURE	repeat:ANK 2	3	1.14943	0.754705	IBTK, TRPV3, ASB3	222	245	20063	1.10662	1	1	100
SMART	SM00248:ANK	3	1.14943	0.756629	IBTK, TRPV3, ASB3	110	249	10057	1.10153	1	0.999982	100
UP_KEYWORDS	ANK repeat	3	1.14943	0.794936	IBTK, TRPV3, ASB3	230	264	20581	1.01685	1	0.988162	100
INTERPRO	IPR002110:Ankyrin repeat	3	1.14943	0.795582	IBTK, TRPV3, ASB3	215	255	18559	1.01554	1	1	100
INTERPRO	IPR020683:Ankyrin repeat-containing domain	3	1.14943	0.812837	IBTK, TRPV3, ASB3	215	265	18559	0.977218	1	1	100
Annotation Cluster 31	Enrichment Score: 0.03730261715315169
Category	Term	Count	%	PValue	Genes	List Total	Pop Hits	Pop Total	Fold Enrichment	Bonferroni	Benjamini	FDR
GOTERM_BP_DIRECT	GO:0006468~protein phosphorylation	5	1.91571	0.769263	SQSTM1, TRIB3, ADM2, CDK15, CDKL2	193	456	16792	0.954004	1	1	100
SMART	SM00220:S_TKc	3	1.14943	0.905438	TRIB3, CDK15, CDKL2	110	359	10057	0.764016	1	1	100
UP_SEQ_FEATURE	domain:Protein kinase	3	1.14943	0.96962	TRIB3, CDK15, CDKL2	222	478	20063	0.5672	1	1	100
INTERPRO	IPR000719:Protein kinase, catalytic domain	3	1.14943	0.977667	TRIB3, CDK15, CDKL2	215	487	18559	0.531751	1	1	100
INTERPRO	IPR011009:Protein kinase-like domain	3	1.14943	0.985736	TRIB3, CDK15, CDKL2	215	531	18559	0.487689	1	1	100
Annotation Cluster 32	Enrichment Score: 0.0359859037661909
Category	Term	Count	%	PValue	Genes	List Total	Pop Hits	Pop Total	Fold Enrichment	Bonferroni	Benjamini	FDR
UP_KEYWORDS	Nucleotide-binding	17	6.51341	0.851079	DTYMK, OAS3, PCK2, CDKL2, NME7, RAB41, ACTG2, TUBA8, RND1, ERCC6, TAP1, AKAP7, SLFN11, MX1, UBE2S, CDK15, NMNAT1	230	1788	20581	0.850785	1	0.994904	100
INTERPRO	IPR027417:P-loop containing nucleoside triphosphate hydrolase	8	3.06513	0.8855	RAB41, ERCC6, RND1, DTYMK, MPP4, TAP1, SLFN11, MX1	215	879	18559	0.785628	1	1	100
UP_KEYWORDS	ATP-binding	11	4.21456	0.950954	ACTG2, ERCC6, DTYMK, TAP1, OAS3, SLFN11, UBE2S, CDK15, CDKL2, NME7, NMNAT1	230	1391	20581	0.707627	1	0.999567	100
GOTERM_MF_DIRECT	GO:0005524~ATP binding	12	4.5977	0.955076	ACTG2, ERCC6, DTYMK, TAP1, OAS3, TRIB3, SLFN11, UBE2S, CDK15, CDKL2, NME7, NMNAT1	191	1495	16881	0.709422	1	1	100
UP_SEQ_FEATURE	nucleotide phosphate-binding region:ATP	7	2.68199	0.965416	ERCC6, DTYMK, TAP1, SLFN11, CDK15, CDKL2, NMNAT1	222	994	20063	0.636436	1	1	100

## Sheet: Supplementary Table 4
Supplementary Table 4. STAT3 partner proteins as determined by mass spectrometry
Gene Symbol #1	MWT(kDa)
MYH9	226.39
MYH10	228.86
FLNA	280.56
AHNAK	628.7
TPM2	32.83
IQGAP1	189.13
CALD1	93.18
PLEC	531.47
SPTAN1	284.36
ACTN1	102.99
ACTN4	104.79
LIMA1	85.17
MYO1C	121.61
FLNB	277.99
FLNC	290.84
TPM1	32.69
HSPA5	72.29
MPRIP	116.46
MYO1B	131.9
SPTBN1	274.44
CLTC	191.49
FLII	144.66
MYL12A	19.78
SMTN	99
SPECC1L	124.53
AKAP2	94.6
PPP1R12A	115.21
MYH14	227.73
TMOD3	39.57
MYO18A	232.97
GAPDH	36.03
HSP90B1	92.41
CAPZA1	32.9
TJP1	195.34
EEF2	95.28
STAT3	88.01
MAP4	120.93
TPM4	28.5
LDHA	36.67
ALDOA	39.4
NPM1	32.55
TPM3	32.93
HSP90AA1	84.61
HSPA8	70.85
DHX9	140.87
COL1A1	138.86
XRCC6	69.8
MCM3	90.92
HSPA9	73.63
CAPZB	31.33
HDLBP	141.37
PPP1R18	67.9
RRBP1	152.38
MYO5A	215.27
PGK1	44.59
ANXA2	38.58
RPL7	29.21
LUZP1	120.2
LRRC59	34.91
DDX21	87.29
RAI14	109.97
TPM2b	33.01
HSPB1	22.77
LDHB	36.62
ANXA5	35.91
TAGLN2	22.38
RPS19	16.05
TPI1	30.77
TWF1	40.26
IMMT	83.63
EFHD2	26.68
PKM	57.9
VDAC1	30.75
UBA1	117.77
MYL9	19.81
TKT	67.83
ACTN2	103.79
RPS7	22.11
YWHAE	29.16
EIF3A	166.47
CORO1C	53.22
LIMCH1	121.79
TPM3	28.74
PDLIM1	36.05
PLOD2	84.63
DDX3Y	73.11
FN1	262.46
ANXA1	38.69
SLC3A2	67.95
HSP90AB1	83.21
PABPC1	70.63
SLC25A6	32.85
XRCC5	82.65
EZR	69.37
VCL	123.72
CFL1	18.49
EEF1D	31.1
MCM7	81.26
HSPA4	94.27
MDH2	35.48
MATR3	94.56
VDAC2	31.55
CAPZA2	32.93
COPA	138.26
HSPA2	69.98
RPS3A	29.93
HNRNPK	50.94
PPP1CA	37.49
RPS16	16.44
RPL7A	29.98
RPS4X	29.58
TUBB4B	49.8
MYO1E	126.98
KPNB1	97.11
ZYX	61.24
KHSRP	73.07
ANLN	124.12
2018-09-09	65.36
HEL-S-265	32.85
CTNND1	108.1
RPLP0	34.25
HNRNPC	33.65
RPS2	31.3
CANX	67.53
PDLIM4	35.38
VCP	89.27
RPS15A	14.83
RPS18	17.71
RPS13	17.21
RPL23A	17.68
RPS6	28.66
RACK1	35.05
NEXN	80.61
CKAP5	225.35
UBAP2L	114.47
CTTN	61.55
CAPRIN1	78.32
LASP1	29.7
NUMA1	238.12
CNN3	36.39
INF2	135.54
HNRNPA1L2	34.2
TWF2	39.52
SND1	101.93
RPLP0P6	34.34
DDX17	80.22
SIPA1	112.08
LARS	134.38
DKFZp686J1372	27.16
CLIC1	26.91
ARPC3	20.53
HNRNPR	70.9
WDR1	66.15
RPN1	68.53
RPLP2	11.66
ITGB1	88.36
PFN1	15.04
CALM2	16.83
PGAM1	28.79
MSN	67.78
SSFA2	138.3
MAPK1	41.36
MCM4	96.5
PHB	29.79
FUS	53.39
RPL35	14.54
UTRN	394.22
NUP153	153.84
GMPS	76.67
HNRNPA3	39.57
ACLY	120.76
CSE1L	110.35
ACTR2	44.73
RPS8	24.19
PSMC6	44.15
RPS24	15.41
RPS25	13.73
YWHAZ	27.73
BASP1	22.68
RPL6	32.71
SRSF1	27.73
EPS8	91.82
DYNC1H1	532.07
RBM39	59.34
GANAB	106.81
ELAVL1	36.07
TOMM34	34.54
LRRFIP1	89.2
HSP90AB3P	68.28
HSP90AB2P	44.32
CCAR2	102.84
PRR11	40.06
PAWR	36.55
HNRNPAB	36.2
ESYT1	122.78
COPS4	46.24
EFHD1	26.91
CTTNBP2NL	70.11
RALY	32.44
TLN1	269.6
TPM1	37.43
XPO1	123.31
ARPC1B	40.92
ARPC2	34.31
SLC16A3	49.44
TPD52L2	22.22
TOMM40	37.87
TFRC	84.82
APRT	19.6
EPRS	170.48
SNRPA1	28.4
HSPA1B	70.01
MTHFD1	101.5
PCNA	28.75
ETFA	35.06
MYL6B	22.75
HMGA1	11.67
DNMT1	183.05
VARS	140.39
APEX1	35.53
ERP29	28.98
RPL12	17.81
HNRNPH3	36.9
PRDX2	21.88
RAB5C	23.47
HNRNPM	77.46
EIF6	26.58
RPS20	13.36
ARF3	20.59
PSME3	29.49
RPL27	15.79
SNRPD2	13.52
RPL23	14.86
RPL10A	24.82
RPL8	28.01
EIF5A	16.82
SARNP	23.66
RPL24	17.77
PFKP	85.54
TAGLN	22.6
RPL18	21.62
C1QBP	31.34
G3BP1	52.13
DCTN1	141.61
PLCB4	134.38
SF3B3	135.49
SF1	68.29
MYLK	210.58
DDB1	126.89
SPECC1	118.51
HIST2H3A	15.38
KTN1	156.18
ALYREF	26.87
AFAP1	80.67
PPP1R13L	89.04
PALLD	150.47
DDX1	82.38
DOCK7	242.41
RBM14	69.45
CNN2	33.68
PHB2	33.28
CPNE1	59.02
EPS8L2	80.57
SFXN1	35.6
CHCHD3	26.14
TMOD2	39.57
TJP2	133.88
PSME2	27.38
MYO6	149.6
CFL2	18.72
DRG1	40.52
NOSIP	33.15
STRAP	38.41
SUPT16H	119.84
COPG1	97.66
HNRNPCL2	32.05
ACOT7	41.77
CIT	231.29
COPE	34.46
DHX15	90.88
BUB3	37.13
EIF5B	138.74
SNRNP200	244.35
GLRX3	37.41
NDUFB4	15.2
ECD	72.71
CYB5R3	34.21
GOT2	47.49
GNAI2	40.43
ATP1A1	112.82
SLC25A5	32.83
LAMB1	197.91
ANXA6	75.83
RPS17	15.54
GNAI3	40.51
HSPD1	61.02
LAMC1	177.49
PYGB	96.63
TOP2A	174.28
TPR	267.13
PRKCSH	59.39
SNRPB	24.59
H2AFX	15.14
CBR1	30.36
HIST1H1C	21.35
STMN1	17.29
GOT1	46.22
TCP1	60.31
RAB3B	24.74
PRPS1L1	34.82
CSRP1	20.55
PPIB	23.73
RRM1	90.01
ACAT1	45.17
DNAJB1	38.02
HMGB2	24.02
YWHAQ	27.75
GRN	63.5
MARCKS	31.54
ATIC	64.58
YWHAB	28.06
RPL9	21.85
MCM5	82.23
CTNNA1	100.01
TALDO1	37.52
RPL3	46.08
HADHA	82.95
TMPO	50.64
LRPPRC	157.81
RANBP1	23.3
NOP2	89.25
RPL21	18.55
RPS9	22.58
RPS10	18.89
MCM2	101.83
EMD	28.98
RAB7A	23.47
SSR4	18.99
ARHGDIA	23.19
HNRNPF	45.64
KIF11	119.09
SUB1	14.39
ARPC4	19.65
CDC42	21.25
YWHAG	28.28
RPS23	15.8
SNRPD1	13.27
SNRPD3	13.91
RPL31	14.45
PPIA	18
AP2B1	104.49
GTF2I	112.35
HNRNPU	90.53
SET	33.47
DST	860.13
SSBP1	17.25
CKAP4	65.98
ILF2	43.04
ILF3	95.28
HNRNPA0	30.82
TRIM28	88.49
EIF3I	36.48
PDAP1	20.62
MOGS	91.86
NACA	23.37
CIRBP	18.64
HNRNPD	38.41
MLEC	32.21
SMC1A	143.14
PDCD11	208.57
USP10	87.08
2018-09-02	41.46
NCAPD2	157.08
EIF4H	27.37
PWP2	102.39
PCBP1	37.47
PCBP2	38.56
MTFR1	36.98
RSU1	31.52
SF3A1	88.83
SLC1A5	56.56
SRSF7	27.35
PDS5A	150.73
RPL13AP3	12.13
UBR3	212.3
DHX30	133.85
CAND1	136.29
FTSJ3	96.5
NUP35	34.75
PDCD6IP	95.96
ATXN2L	113.3
RAB1C	22
DDX27	89.78
ITCH	102.74
PDLIM2	37.44
QKI	37.65
EIF3C	105.28
HSD17B10	26.91
DDX50	82.51
CORO1B	54.2
DDX24	96.27
NAT10	115.66
RPRD1B	36.88
ATAD3A	71.32
AATF	63.09
UGGT1	177.08
H2AFY2	40.03
SAE1	38.43
STOML2	38.51
MYO5B	213.54
VDAC3	30.64
HYOU1	111.27
CD2AP	71.41
MTCH2	33.31
CALD1	62.63
TPM1	31.73
TPM2	32.79
PLEKHG3	134.33
SMCHD1	226.23
FHAD1	161.8
KIF2A	79.9
AIP	37.61
DNM1L	81.83
AP3D1	130.08
ACOT8	35.89
PDCD5	14.28
POLR3A	155.54
TAX1BP3	13.73
TIMM23	21.93
HNRNPDL	46.41
SPTBN2	271.16
PFAS	144.64
PGRMC2	23.8
EIF3D	63.93
SART1	90.2
NDUFB5	21.74
SYNCRIP	69.56
GMDS	41.92
EDF1	16.36
OBSL1	206.82
DNAJC13	254.25
SIN3B	132.98
SEC22B	24.58
NDUFS3	30.22
SRSF10	31.28
ECI2	43.56
NUP155	155.1
BCAS2	26.11
DNAJC8	29.82
ATP5H	18.48
RSL1D1	54.94
MTA2	74.98
PRPF6	106.86
SBF1	208.18
VAPB	27.21
ACSL3	80.37
WIZ	178.56
GNA14	41.54
MBD3	32.82
VTN	54.27
TK1	25.45
CAPNS1	28.3
RPLP1	11.51
ENO1	47.14
PYGL	97.09
P4HB	57.08
TUBB	49.64
CTSB	37.8
THBS1	129.3
PFKM	85.13
SNRPB2	25.47
ACAA1	44.26
GSTP1	23.34
CNP	47.55
ALDOC	39.43
SPTB	246.32
PRPS2	34.75
F5	251.55
ATP2A2	114.68
CTPS1	66.65
DDX5	69.1
ARF4	20.5
EIF2AK2	62.06
PTMS	11.52
RPS4Y1	29.44
EEF1B2	24.75
RPA1	68.1
CAD	242.83
PSMA5	26.39
GTF2E2	33.02
EPHA2	108.2
GNA11	42.1
PRDX3	27.68
CMPK1	22.21
PEBP1	21.04
PPIF	22.03
PFN2	15.04
RFC4	39.66
RFC2	39.13
RPL22	14.78
COPB2	102.42
ATP5C1	32.98
LONP1	106.42
TXLNA	61.85
RFC3	40.53
PRPH	53.62
IARS	144.41
CDKN2A	16.52
MSH2	104.68
USP5	95.73
CRK	33.81
MAP2K3	39.29
RPL28	15.74
RPS5	22.86
MAP1B	270.47
QARS	87.74
ATP5O	23.26
PRRC2A	228.72
RPL34	13.28
FXR1	69.68
SMARCA4	184.53
HSD17B4	79.64
PSMD7	37
HDGF	26.77
CNN1	33.15
KPNA2	57.83
SMS	41.24
CRIP2	22.48
SEC24C	118.25
CLNS1A	26.2
RARS	75.33
AK2	26.46
ALDH18A1	87.25
SNU13	14.16
NPEPPS	103.21
HNRNPH2	49.23
ATP5J2	10.91
RAB10	22.53
LYZ	16.53
COPZ1	20.19
DCAF7	38.9
PPP1CB	37.16
RHOB	22.11
RAB1A	22.66
RAP1A	20.97
RPS26	13.01
GNB2	37.31
RPL11	20.24
TRA2B	33.65
GNAS	45.64
PPP2CA	35.57
UBE2L3	17.85
PAFAH1B2	25.55
HBB	15.99
RPP30	29.3
RAE1	40.94
ST5	126.41
MRPS9	45.81
RPL19	23.45
CYCS	11.74
SLC25A3	40.07
GTF2B	34.81
EWSR1	68.44
KIF23	109.99
SLC25A11	34.04
LMNB2	69.91
CEBPZ	120.9
UBXN1	33.3
EIF4G1	175.38
NOTCH2	265.23
GLO1	20.76
YWHAH	28.2
SRSF11	53.51
PRDX1	22.1
CRYZ	35.18
GOLGA2	113.02
SSRP1	81.02
ASPH	85.81
TARDBP	44.71
PRDX4	30.52
PICALM	70.71
MED21	15.55
TRA2A	32.67
ALCAM	65.06
BOP1	83.58
SCRIB	174.78
EIF4A2	46.37
HSP90AA2P	39.34
TRIP12	220.3
EFTUD2	109.37
KARS	68
PEA15	15.03
TOMM20	16.29
SEC23A	86.11
DPYSL2	62.25
NDUFA9	42.48
TXNRD1	70.86
MAP7D1	92.76
TIMM50	39.62
HSP90AB4P	58.23
ZNF326	65.61
MEST	38.81
UBE2NL	17.37
NUP188	195.92
MRPL2	33.28
ECM29	204.16
ARHGAP11A	113.8
ZC3H14	82.82
NUFIP2	76.07
HDGFL2	74.27
NOP9	69.39
MTDH	63.8
IQGAP3	184.58
THOC6	37.51
WDR75	94.44
MRPL41	15.37
NUP93	93.43
ENAH	66.47
ABCF1	95.87
SYNE1	1010.46
SMARCC2	132.8
NPLOC4	68.08
DDX54	98.53
NOC3L	92.49
NUP133	128.9
PSPC1	58.71
GATAD2B	65.22
HSPH1	96.8
NUP205	227.78
PXDN	165.17
GGH	35.94
SMARCC1	122.79
HIST1H2AC	14.1
UTP4	76.84
FERMT2	77.81
FUBP1	67.52
EXOSC8	30.02
CCDC124	25.82
OTUB1	31.26
CHMP6	23.47
DCUN1D1	30.11
VPS35	91.65
SIN3A	145.08
CDC5L	92.19
COPS8	23.21
KIF2C	81.26
ATXN2	140.2
ACO2	85.37
CCT7	59.33
PRMT1	41.49
NCAPG	114.26
APOL2	37.07
AIF1L	17.06
SRSF8	32.27
HNRNPUL1	95.68
TMEM109	26.19
GNL3	61.95
RBM4	40.29
SRRT	100.6
MRPL1	36.89
NIFK	34.2
UACA	162.4
TNKS1BP1	181.69
SLIRP	12.34
RACGAP1	70.98
TRIOBP	261.22
ADNP	123.49
UNC45A	103.01
CHMP4B	24.93
HEATR1	242.22
DHX35	78.86
NOL6	127.51
JPT2	20.05
XPO5	136.22
CACYBP	26.19
RPS10P5	20.11
PFDN4	15.3
PDLIM7	49.81
PNO1	27.91
SMC4	147.09
DDX18	75.36
TEX10	105.61
DNAH9	511.55
BCLAF1	106.06
IGF2BP1	63.44
EHD2	61.12
CHMP5	24.56
VAPA	27.88
DNAJB4	37.78
C19orf25	12.87
SRP68	70.69
PFDN2	16.64
TAGLN3	22.46
TRMT112	14.19
CDC42EP3	27.66
PNMA2	41.48
PPP1R9A	123.27
TPX2	85.6
G3BP2	54.09
SSR3	21.07
PSMD13	42.92
MACF1	837.79
ZC3H4	140.17
CTNND2	132.57
SMC3	141.45
EIF3L	66.68
SF3B6	14.58
REXO2	26.82
PTRH2	19.18
HES2	18.46
SRPRB	29.68
LRRFIP2	82.12
TPM1	32.66
MYO6	144.92
MYO1C	98.87
COL1A1	84.69
ESYT2	97.95
RPL14	23.77
THRAP3	41.83
PLEC1	4.14
